# Supplementary material for: Enrichment of CD146+ Adipose-Derived Stem Cells in Combination with Articular Cartilage Extracellular Matrix Scaffold Promotes Cartilage Regeneration
Source: PubMed Central journal article supplement (PMC6691381; doi:10.7150/thno.33904), 2019-07-09
Supplement: thnov09p5105s1.pdf [file thnov09p5105s1.pdf]

**Enrichment of CD146<sup>+</sup> adipose-derived stem cells in combination  
with articular cartilage extracellular matrix scaffold promotes  
cartilage regeneration**

**Supplementary materials**

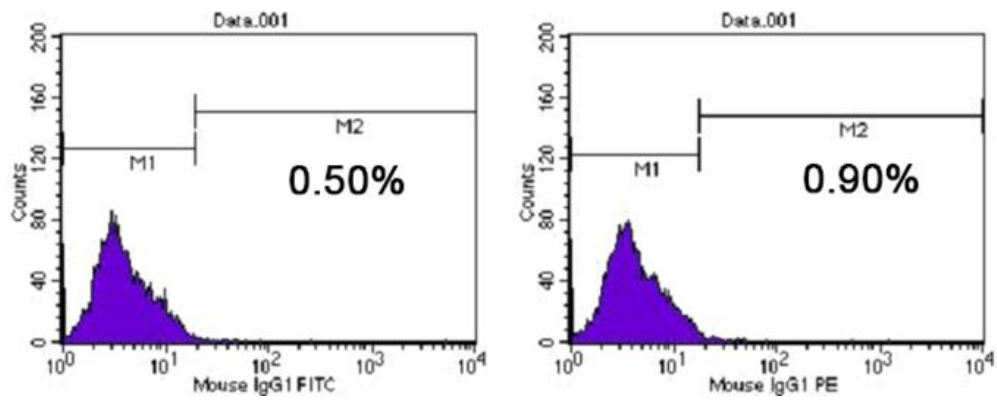

**Figure S1.** Isotype control of flow cytometry

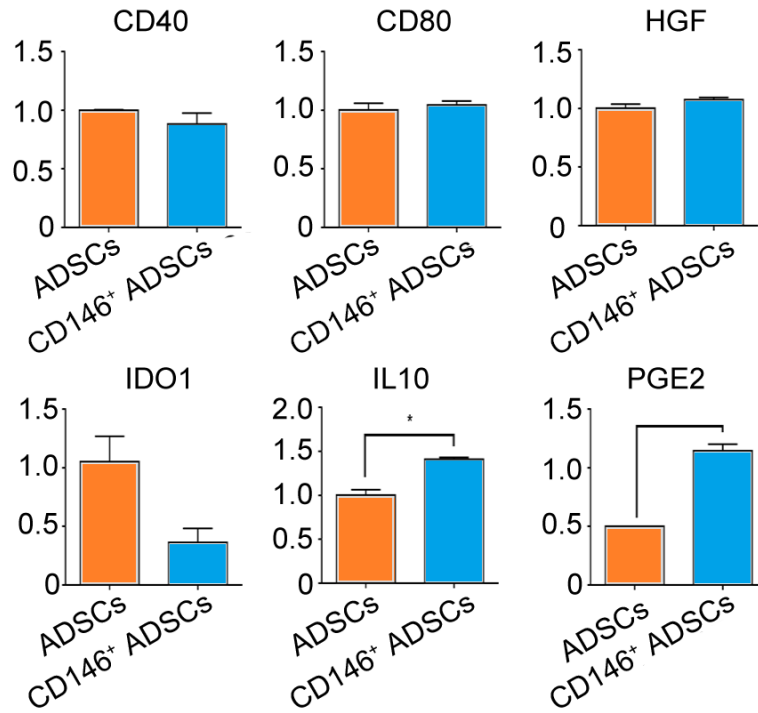

**Figure S2.** Quantification of mRNA levels of *CD40*, *CD80*, *HGF*, *IDO1*, *IL10*, and *PGE2* in CD146<sup>+</sup> cells and hADSCs by qRT-PCR. Data represent mean  $\pm$ SD from three independent experiments.

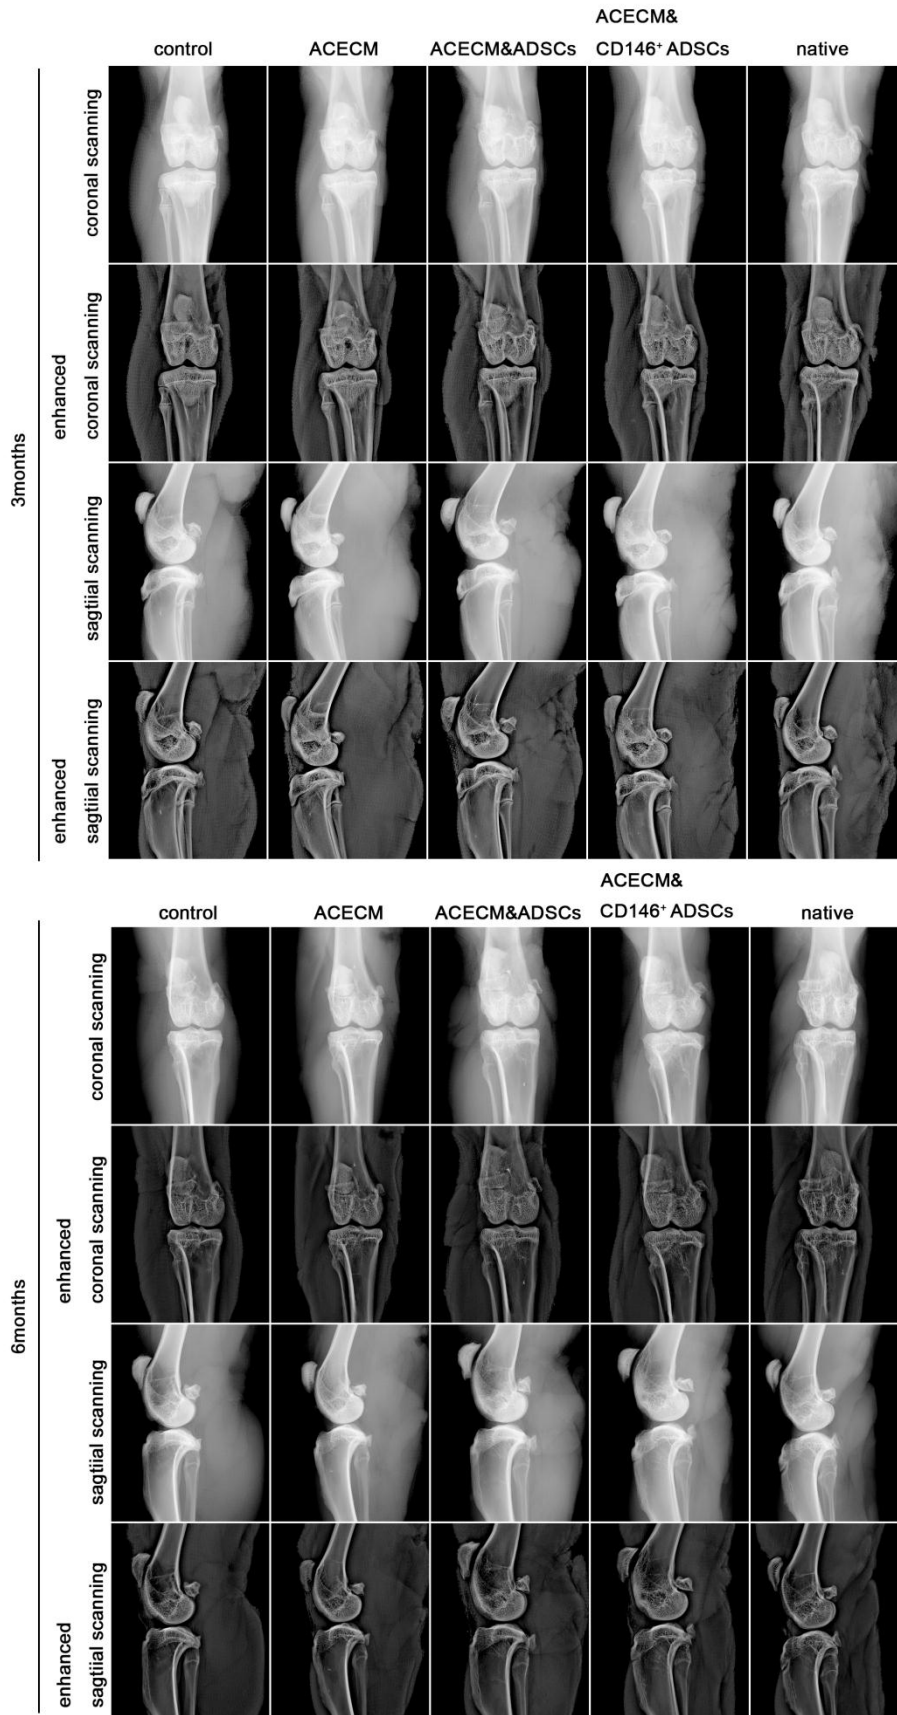

**Figure S3.** X-ray images of rabbit knees at 3 months and 6 months after surgery.

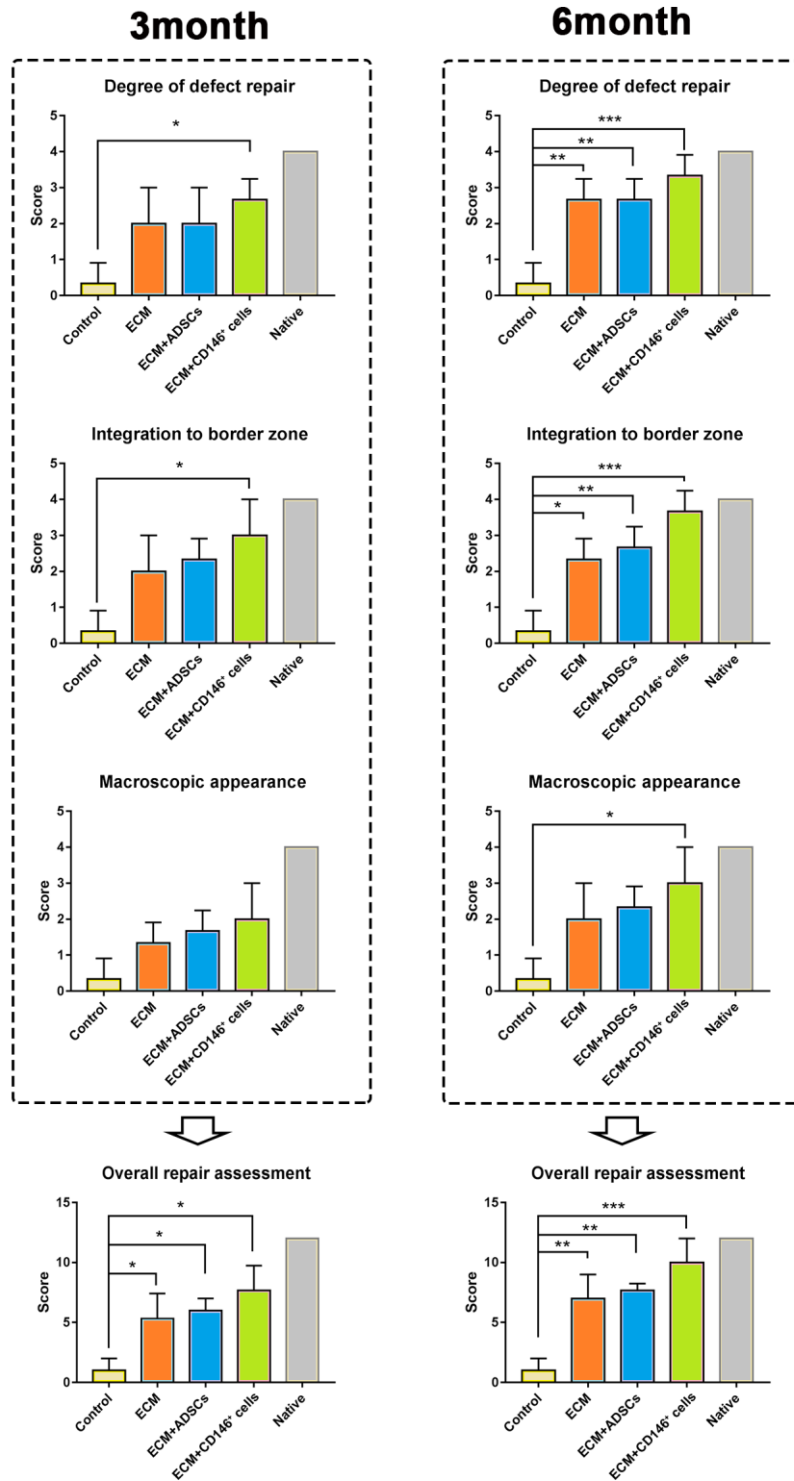

**Figure S4.** ICRS scoring system for macroscopic evaluation of cartilage repair after 3 and 6 months. The results represent the mean  $\pm$  standard error of the mean. \* $P < 0.05$ , \*\* $P < 0.01$ .

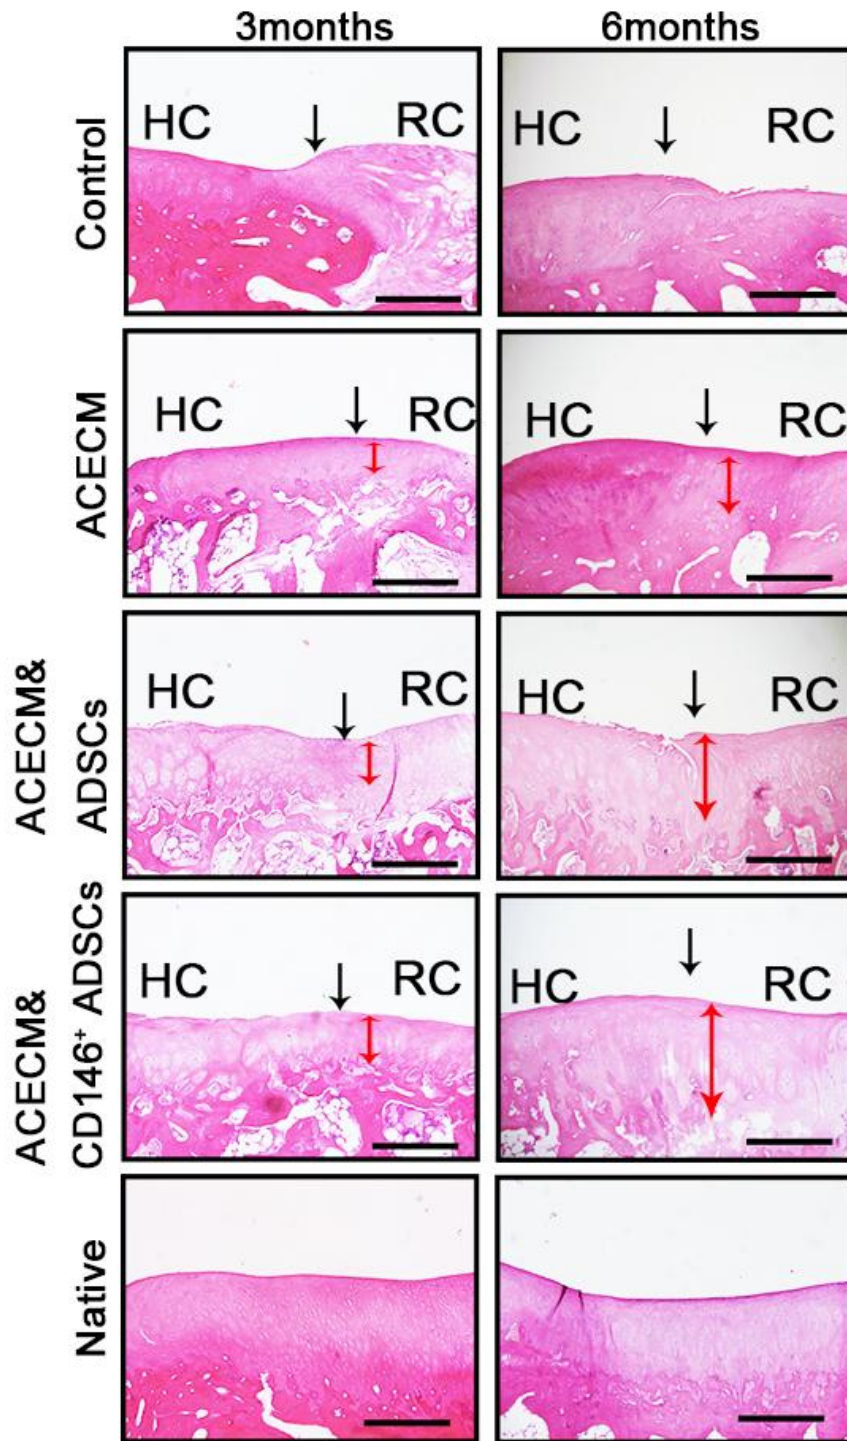

**Figure S5.** Histological analysis of cartilage defect after 3 and 6 months by H&E staining. The black solid arrows denote the repair interface. The red solid arrows denote the depth of the repaired cartilage. HC, host cartilage; RC, repaired cartilage. Scale bar: 200  $\mu$ m.

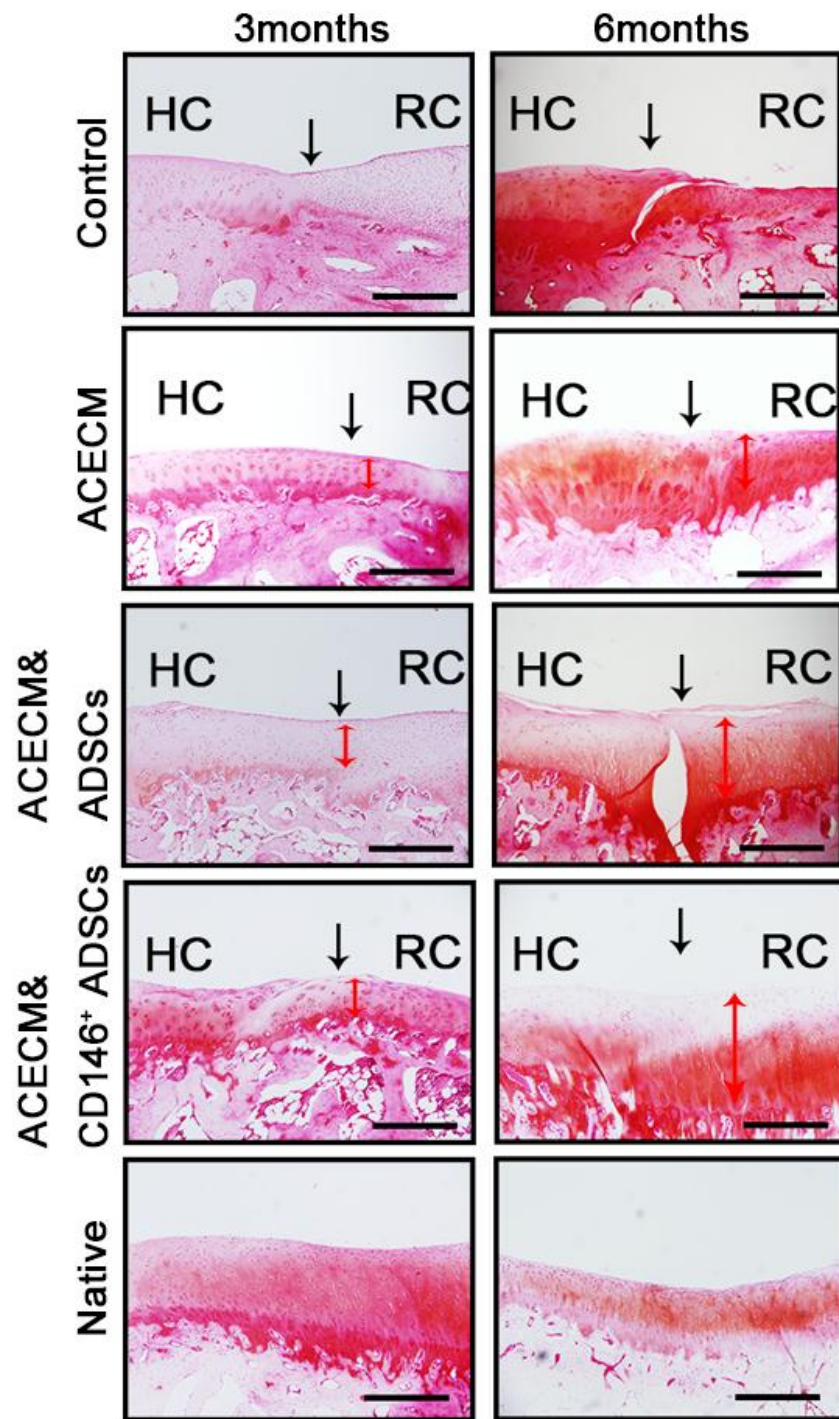

**Figure S6.** Histological analysis of cartilage defect after 3 and 6 months by Safranin O staining.

The black solid arrows denote the repair interface. The red solid arrows denote the depth of the repaired cartilage. HC, host cartilage; RC, repaired cartilage. Scale bar: 200  $\mu$ m



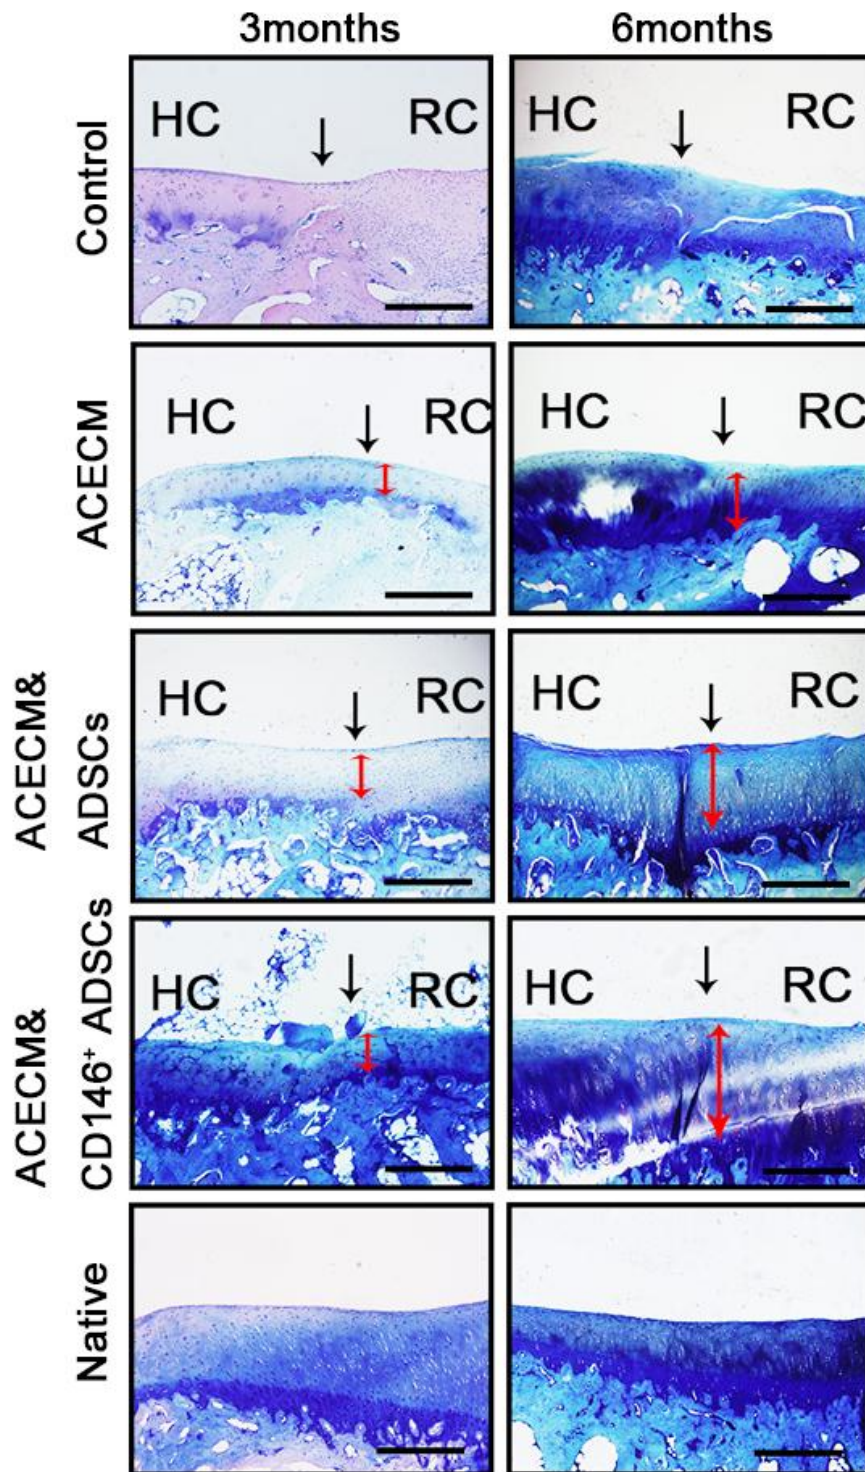

**Figure S7.** Histological analysis of cartilage defect after 3 and 6 months by Toluidine Blue staining. The black solid arrows denote the repair interface. The red solid arrows denote the depth of the repaired cartilage. HC, host cartilage; RC, repaired cartilage. Scale bar: 200  $\mu$ m.



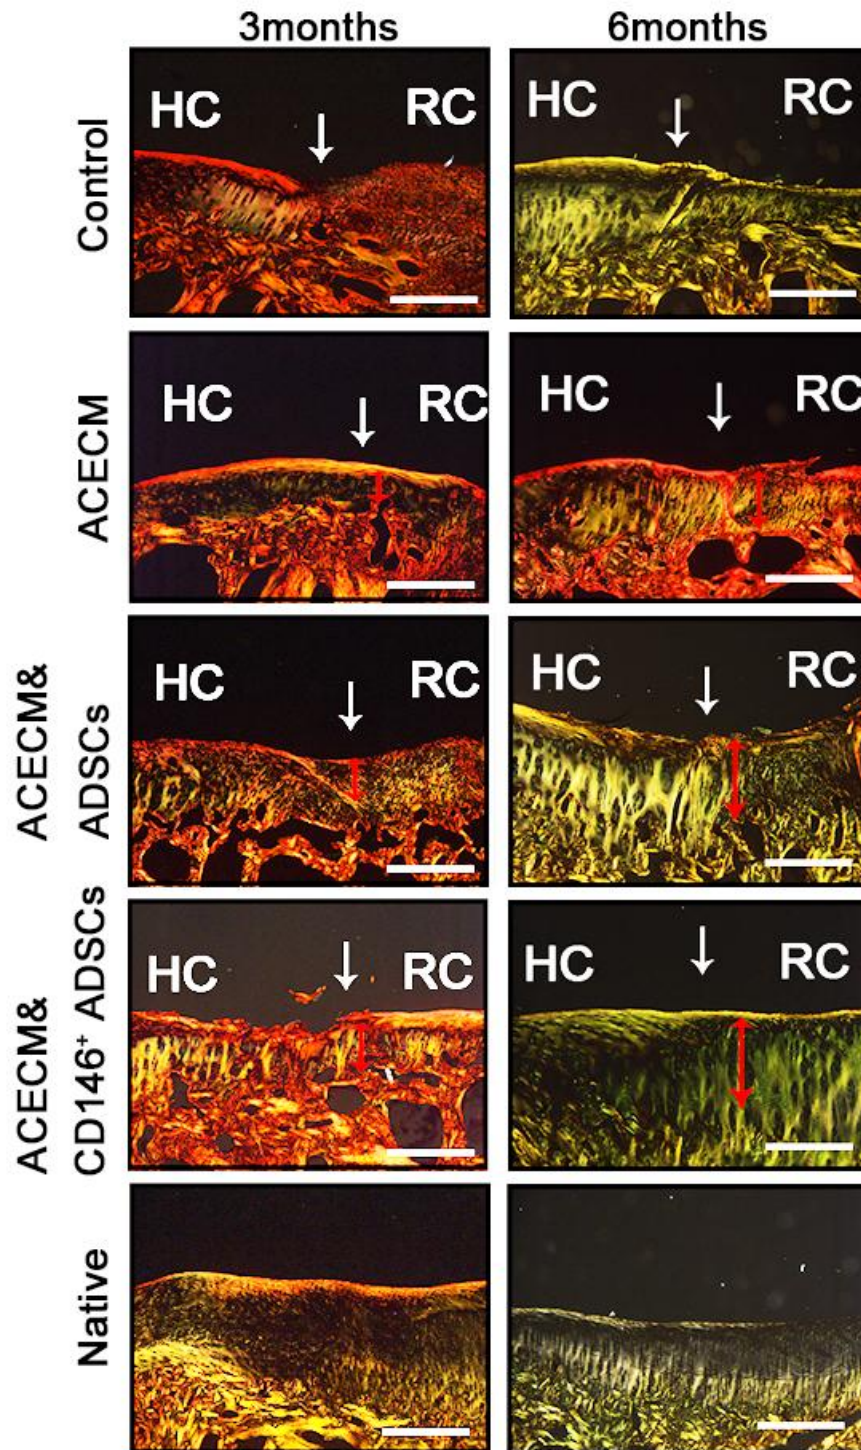

**Figure S8.** Histological analysis of cartilage defect after 3 and 6 months by Sirius Red staining.

The black solid arrows denote the repair interface. The red solid arrows denote the depth of the repaired cartilage. HC, host cartilage; RC, repaired cartilage. Scale bar: 200  $\mu$ m.

**Table S1.** List of Primers Used for RT-PCR Analysis

| Gene  | Forward primer       | Reverse primer        |
|-------|----------------------|-----------------------|
| CD80  | GCTGGCTGGTCTTTCTCACT | GTGCCAGCTCTTCAACAGAA  |
| CD40  | CTCACCTCGCTATGGTTCGT | GGCACAAAGAACAGCACTGA  |
| IdO1  | GATGAAGAAGTGGGCTTTGC | CAGGCAGATGTTTAGCAATGA |
| PGE2  | CCTTCTTCGAAAGTTTTGCC | ATGTGCAGTTGCCCTCTGTA  |
| HGF   | CGCTGGGAGTACTGTGCAAT | CCCTGTAGCCTTCTCCTTGA  |
| IL-10 | GTGGAGCAGGTGAAGAATGC | GCCACCCTGATGTCTCAGTT  |
| ACTIN | ACCTTCTACAATGAGCTGCG | CCTGGATAGCAACGTACATGG |
| GAPDH | CAAGAAGGTGGTGAAGCAGG | GGTGTCGCTGTTGAAGTCAG  |

**Table S2. Score System for MRI Evaluation**

| <b>Criteria</b>                                  | <b>Findings</b>                  | <b>Scores</b> |
|--------------------------------------------------|----------------------------------|---------------|
| <b>Repaired cartilage signal</b>                 | Isointense                       | 2             |
|                                                  | Hyperintense                     | 1             |
|                                                  | Hypointense                      | 0             |
| <b>Repaired lesion morphologic features</b>      | Flush                            | 2             |
|                                                  | Proud                            | 1             |
|                                                  | Depressed                        | 0             |
| <b>Repaired cartilage fill</b>                   | Good (67%-100%)                  | 2             |
|                                                  | Moderate (34%-66%)               | 1             |
|                                                  | Poor (0%-33%)                    | 0             |
| <b>Peripheral repaired cartilage integration</b> | No gap                           | 2             |
|                                                  | Small (gap of $\leq 2$ mm)       | 1             |
|                                                  | Large (gap of $> 2$ mm)          | 0             |
| <b>Subchondral edema</b>                         | None                             | 3             |
|                                                  | Mild ( $< 1$ cm <sup>2</sup> )   | 2             |
|                                                  | Moderate (1-3 cm <sup>2</sup> )  | 1             |
|                                                  | Severe ( $> 3$ cm <sup>2</sup> ) | 0             |
| <b>Osseous overgrowth</b>                        | No                               | 1             |
|                                                  | Yes                              | 0             |

**Table S3.** International Cartilage Repair Society Macroscopic  
Evaluation of Cartilage Repair

| Cartilage repair assessment ICRS                                                    | Points |
|-------------------------------------------------------------------------------------|--------|
| Degree of defect repair                                                             |        |
| In level with surrounding cartilage                                                 | 4      |
| 75% repair of defect depth                                                          | 3      |
| 50% repair of defect depth                                                          | 2      |
| 25% repair of defect depth                                                          | 1      |
| 0% repair of defect depth                                                           | 0      |
| Integration to border zone                                                          |        |
| Complete integration with surrounding cartilage                                     | 4      |
| Demarcating border <1 mm                                                            | 3      |
| 3/4th of graft integrated, 1/4th with a notable border >1 mm width                  | 2      |
| 1/2 of graft integrated with surrounding cartilage, 1/2 with a notable border >1 mm | 1      |
| From no contact to 1/4th of graft integrated with surrounding cartilage             | 0      |
| Macroscopic appearance                                                              |        |
| Intact smooth surface                                                               | 4      |
| Fibrillated surface                                                                 | 3      |
| Small, scattered fissures or cracks                                                 | 2      |
| Several, small or few but large fissures                                            | 1      |
| Total degeneration of grafted area                                                  | 0      |
| Overall repair assessment                                                           |        |
| Grade I: normal                                                                     | 12     |
| Grade II: nearly normal                                                             | 11–8   |
| Grade III: abnormal                                                                 | 7–4    |
| Grade IV: severely abnormal                                                         | 3–1    |

ICRS, International Cartilage Repair Society.

**Table S4.** International Cartilage Repair Society Visual Histological Assessment Scale for Cartilage Repair

| Feature                                               | Points |
|-------------------------------------------------------|--------|
| I. Surface                                            |        |
| Smooth/continuous                                     | 3      |
| Discontinuities/irregularities                        | 0      |
| II. Matrix                                            |        |
| Hyaline                                               | 3      |
| Mixture: hyaline/fibrocartilage                       | 2      |
| Fibrocartilage                                        | 1      |
| Fibrous tissue                                        | 0      |
| III. Cell distribution                                |        |
| Columnar                                              | 3      |
| Mixed/columnar clusters                               | 2      |
| Clusters                                              | 1      |
| Individual cells/disorganized                         | 0      |
| IV. Cell population viability                         |        |
| Predominantly viable                                  | 3      |
| Partially viable                                      | 1      |
| <10% viable                                           | 0      |
| V. Subchondral bone                                   |        |
| Normal                                                | 3      |
| Increased remodeling                                  | 2      |
| Bone necrosis/granulation tissue                      | 1      |
| Detached/fracture/callus at base                      | 0      |
| VI. Cartilage mineralization<br>(calcified cartilage) |        |
| Normal                                                | 3      |
| Abnormal/inappropriate location                       | 0      |
